# Supplementary material for: Reconstruction of a 2D layer of KBr on Ir(111) and electromechanical alteration by graphene
Source: publisher site journal article supplement (doi:10.3762/bjnano.12.35), 2021-05-11
Supplement: Additional file 1 [file 2190-4286-12-35-S1.pdf]

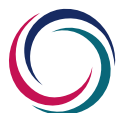

## Supporting Information

for

### **Reconstruction of a 2D layer of KBr on Ir(111) and electromechanical alteration by graphene**

Zhao Liu, Antoine Hinaut, Stefan Peeters, Sebastian Scherb, Ernst Meyer, Maria Clelia Righi and Thilo Glatzel

*Beilstein J. Nanotechnol.* **2021**, 12, 432–439. doi:10.3762/bjnano.12.35

## Additional experimental data

After additional calculations, the cell that remains most representative contains 12 Ir and 7 KBr units along the  $x$  direction (horizontal direction in the slides). Indeed the mismatch between the theoretical lattice parameters of KBr and Ir within this cell ( $-1.98\%$ ) is very similar to the experimental one of  $-1.86\%$  in the cell containing 21 Ir units. Moreover, the energy of the relaxed structure in this cell is the lowest among all considered. So we may refer to this structure for a possible model of the “local” system geometry and partial charges.

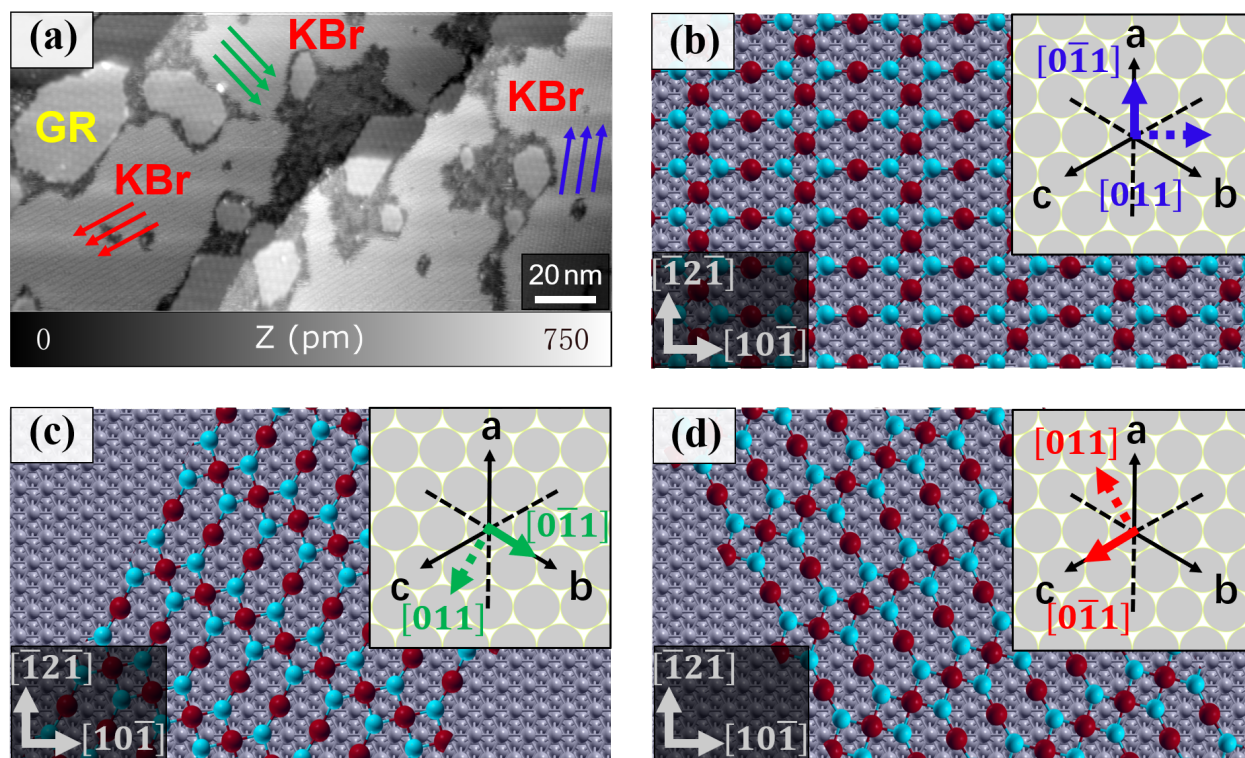

**Figure S1:** Three rotated domains of the reconstructed KBr(100) lattice with the related models (inset orthogonal arrows with the solid line for  $[0\bar{1}1]$  (orientation without corrugation) and dotted line for  $[011]$  (orientation with corrugation) on hexagonal Ir(111) surface (red for Br atoms, blue for K atoms and grey for iridium atoms)). (a) Topography image of three KBr orientations on Ir(111) in total via nc-AFM ( $A_1 = 2$  nm,  $\Delta f_1 = -30$  Hz,  $\gamma = -25.9$  pN nm $^{1/2}$ ). (b) Model in  $0^\circ$  rotation. (c) Model in  $120^\circ$  rotation. (d) Model in  $-120^\circ$  rotation.

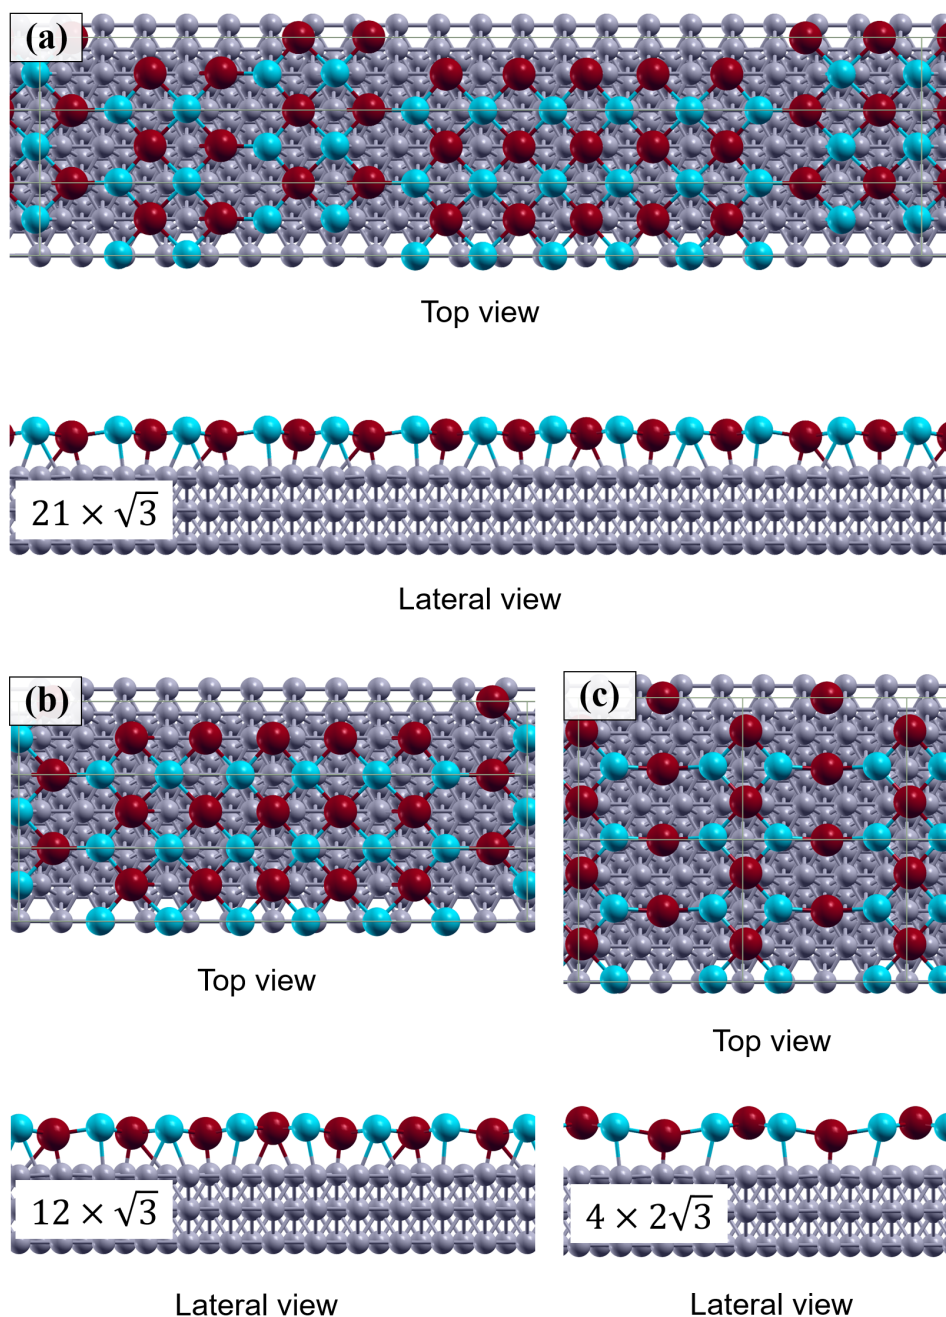

**Figure S2:** Three calculated KBr reconstructed models on Ir(111) by DFT method from long to short periodicities (red for Br atoms, blue for K atoms and grey for iridium atoms). (a)  $21 \times \sqrt{3}$ , repeated three times along the  $[0\bar{1}1]$  direction, with the adsorption energy of  $-0.46$  eV/unit. (b)  $12 \times \sqrt{3}$ , repeated three times along the  $[0\bar{1}1]$  direction, with the adsorption energy of  $-0.82$  eV/unit. (c)  $4 \times 2\sqrt{3}$ , repeated two times along the  $[0\bar{1}1]$  direction, with the adsorption energy of  $-0.91$  eV/unit.

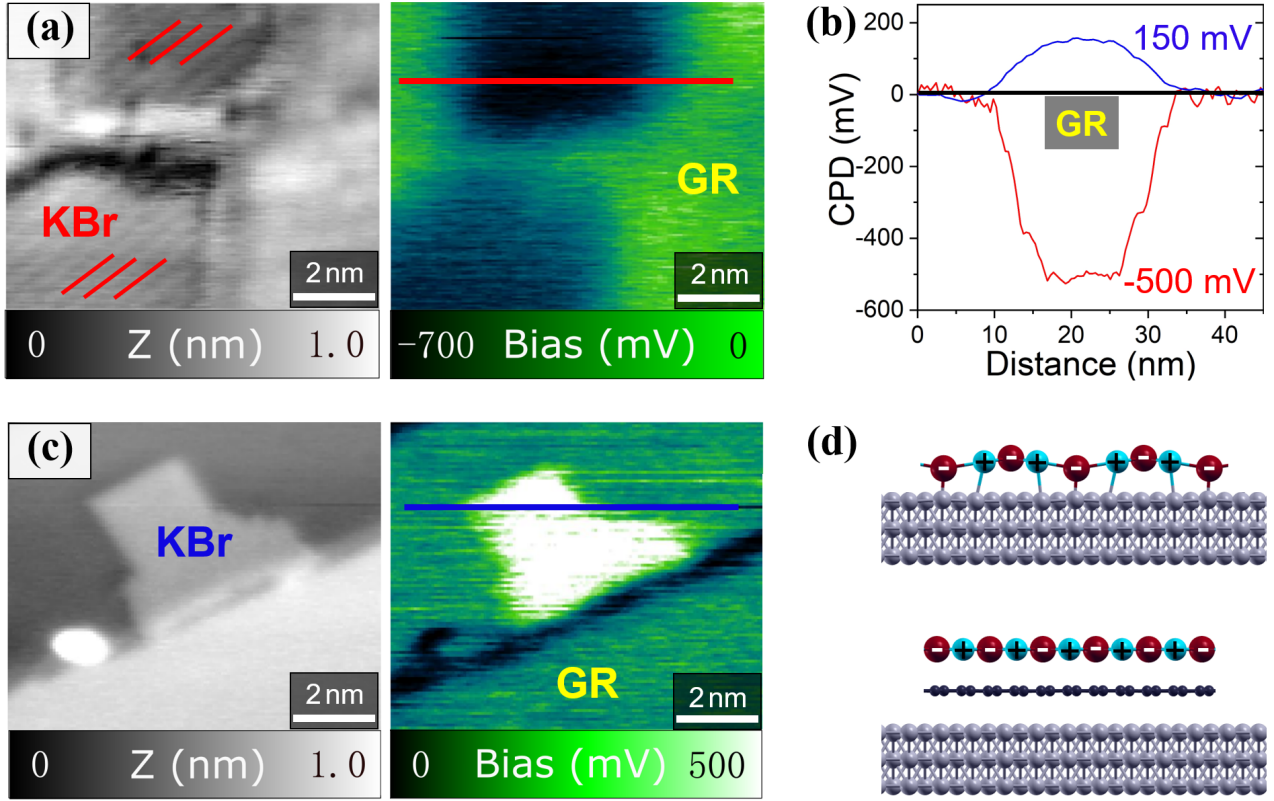

**Figure S3:** KPFM images of KBr islands accompanied with topography in nc-AFM. (a) KBr island next to the graphene flake ( $A_1 = 2$  nm,  $\Delta f_1 = -15$  Hz,  $\gamma = -12.9$  pN nm<sup>1/2</sup>). (b) CPD profiles of two KBr in (a) and (c) compared with graphene. (c) KBr island on the graphene sheet ( $A_1 = 5$  nm,  $\Delta f_1 = -5$  Hz,  $\gamma = -17.1$  pN nm<sup>1/2</sup>). (d) The separated charge layers in the reconstructed KBr and the electrically neutral state in the cubic KBr (red for Br atom, blue for K atom and grey for iridium atom).
